# Supplementary material for: A regional genomic surveillance program is implemented to monitor the occurrence and emergence of SARS-CoV-2 variants in Yubei District, China
Source: Springer Nature journal article supplement (doi:10.1186/s12985-023-02279-6), 2024-01-08

**A****BA.5.2.48\***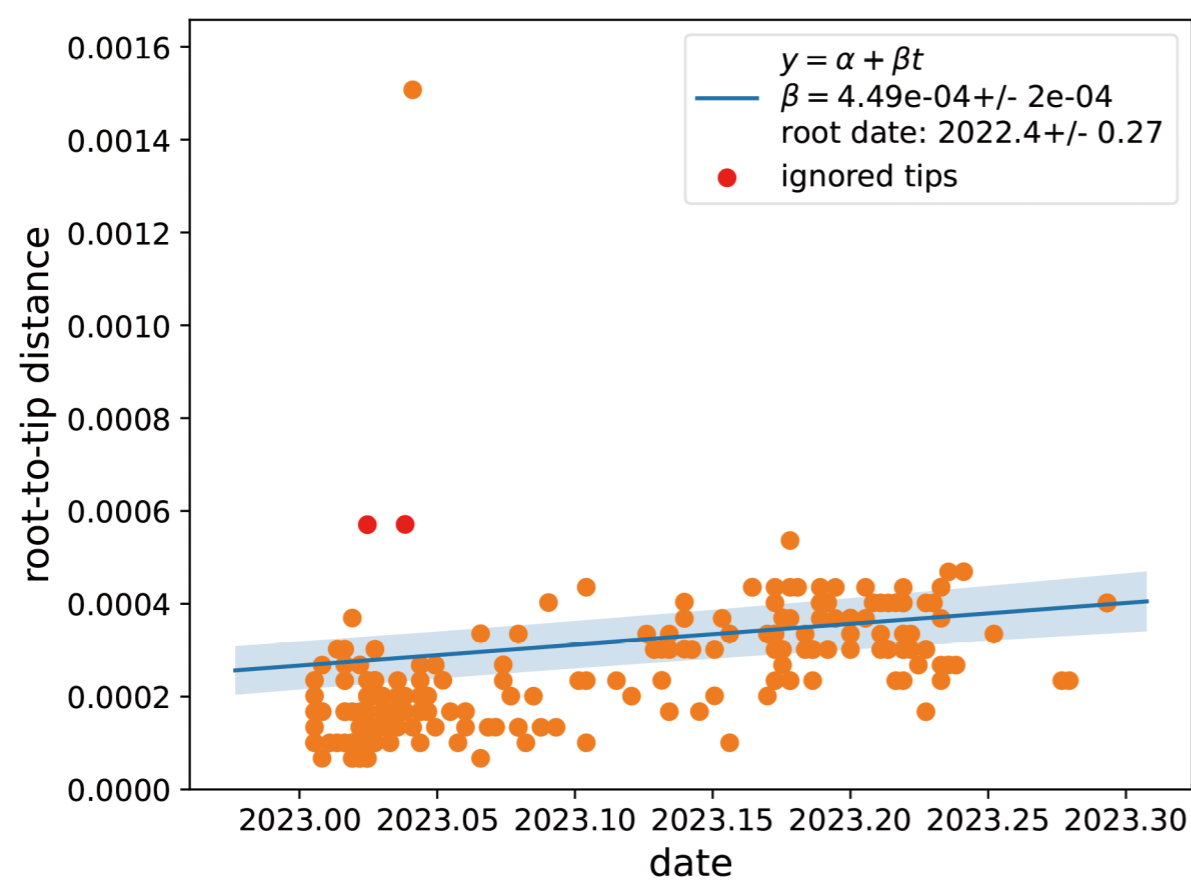**B****BA.2.75\***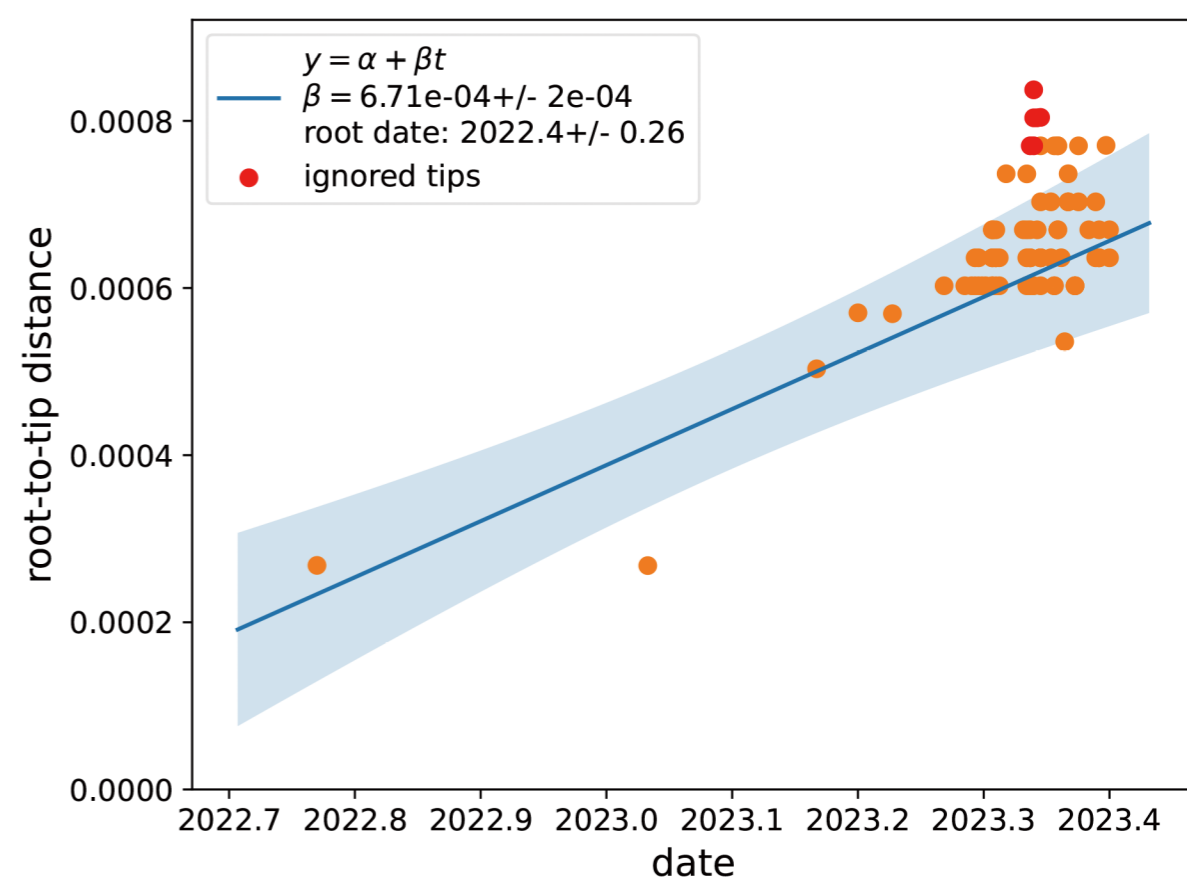**C****XBB.1.9.1\***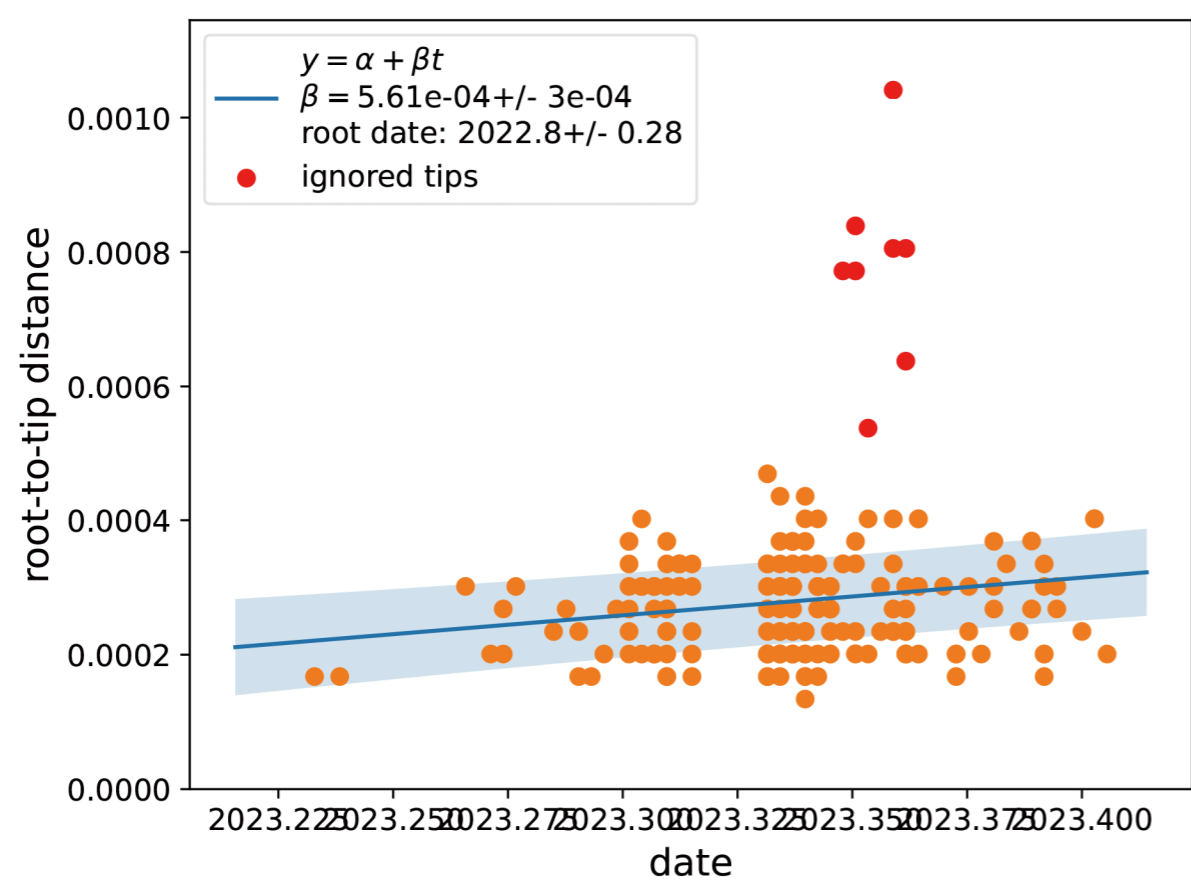**D****XBB.1.5\***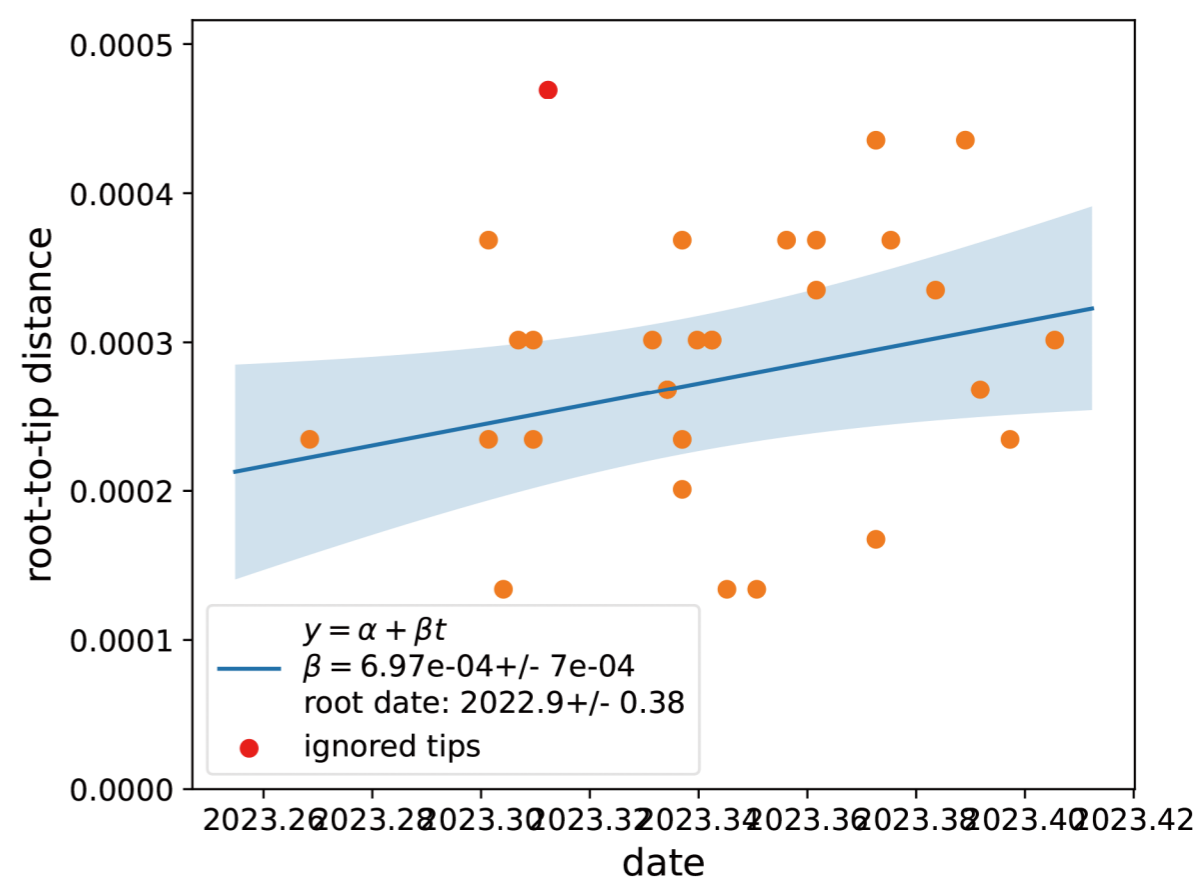**E****XBB.1.16\***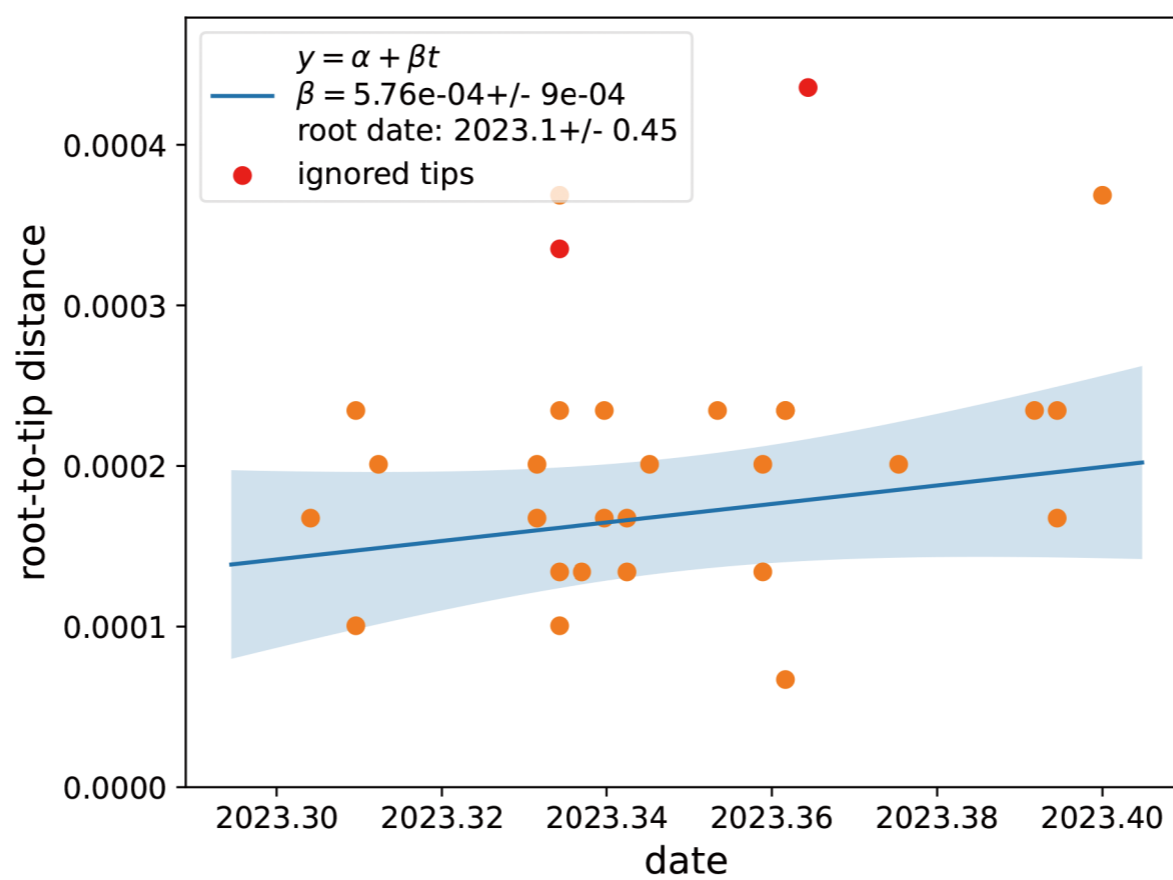

Supplement: MOESM1 [file 26606620]
