# Supplementary material for: A regional genomic surveillance program is implemented to monitor the occurrence and emergence of SARS-CoV-2 variants in Yubei District, China
Source: Springer Nature journal article supplement (doi:10.1186/s12985-023-02279-6), 2024-01-08

division

- Yubei
- Liangjiang New Area
- Jiangbei
- Beibei
- Changshou
- Hubei
- Singapore
- Fujian
- Sichuan
- Zhejiang
- Chongqing
- Anhui
- Guangdong
- Shanghai
- Yunnan
- England
- Guangxi
- Hainan
- Shandong
- Shanxi
- North Rhine-Westphal
- Tabriz
- Hebei
- Jiangsu
- Xinjiang
- Henan
- Italy
- Jiangxi
- Moscow
- Baden-Wurttemberg
- Beijing
- Carinthia
- Cork
- Gansu
- Gujarat
- Hamburg
- Haryana
- Hovedstaden
- Hunan
- lasi
- Korea
- Maharashtra
- Manitoba
- Ningxia
- Occitanie
- Plaine-Wilhems
- Qinghai
- Riemst
- Saxony-Anhalt
- Shaanxi
- Spain
- Telangana
- Tianjin
- Upper Austria

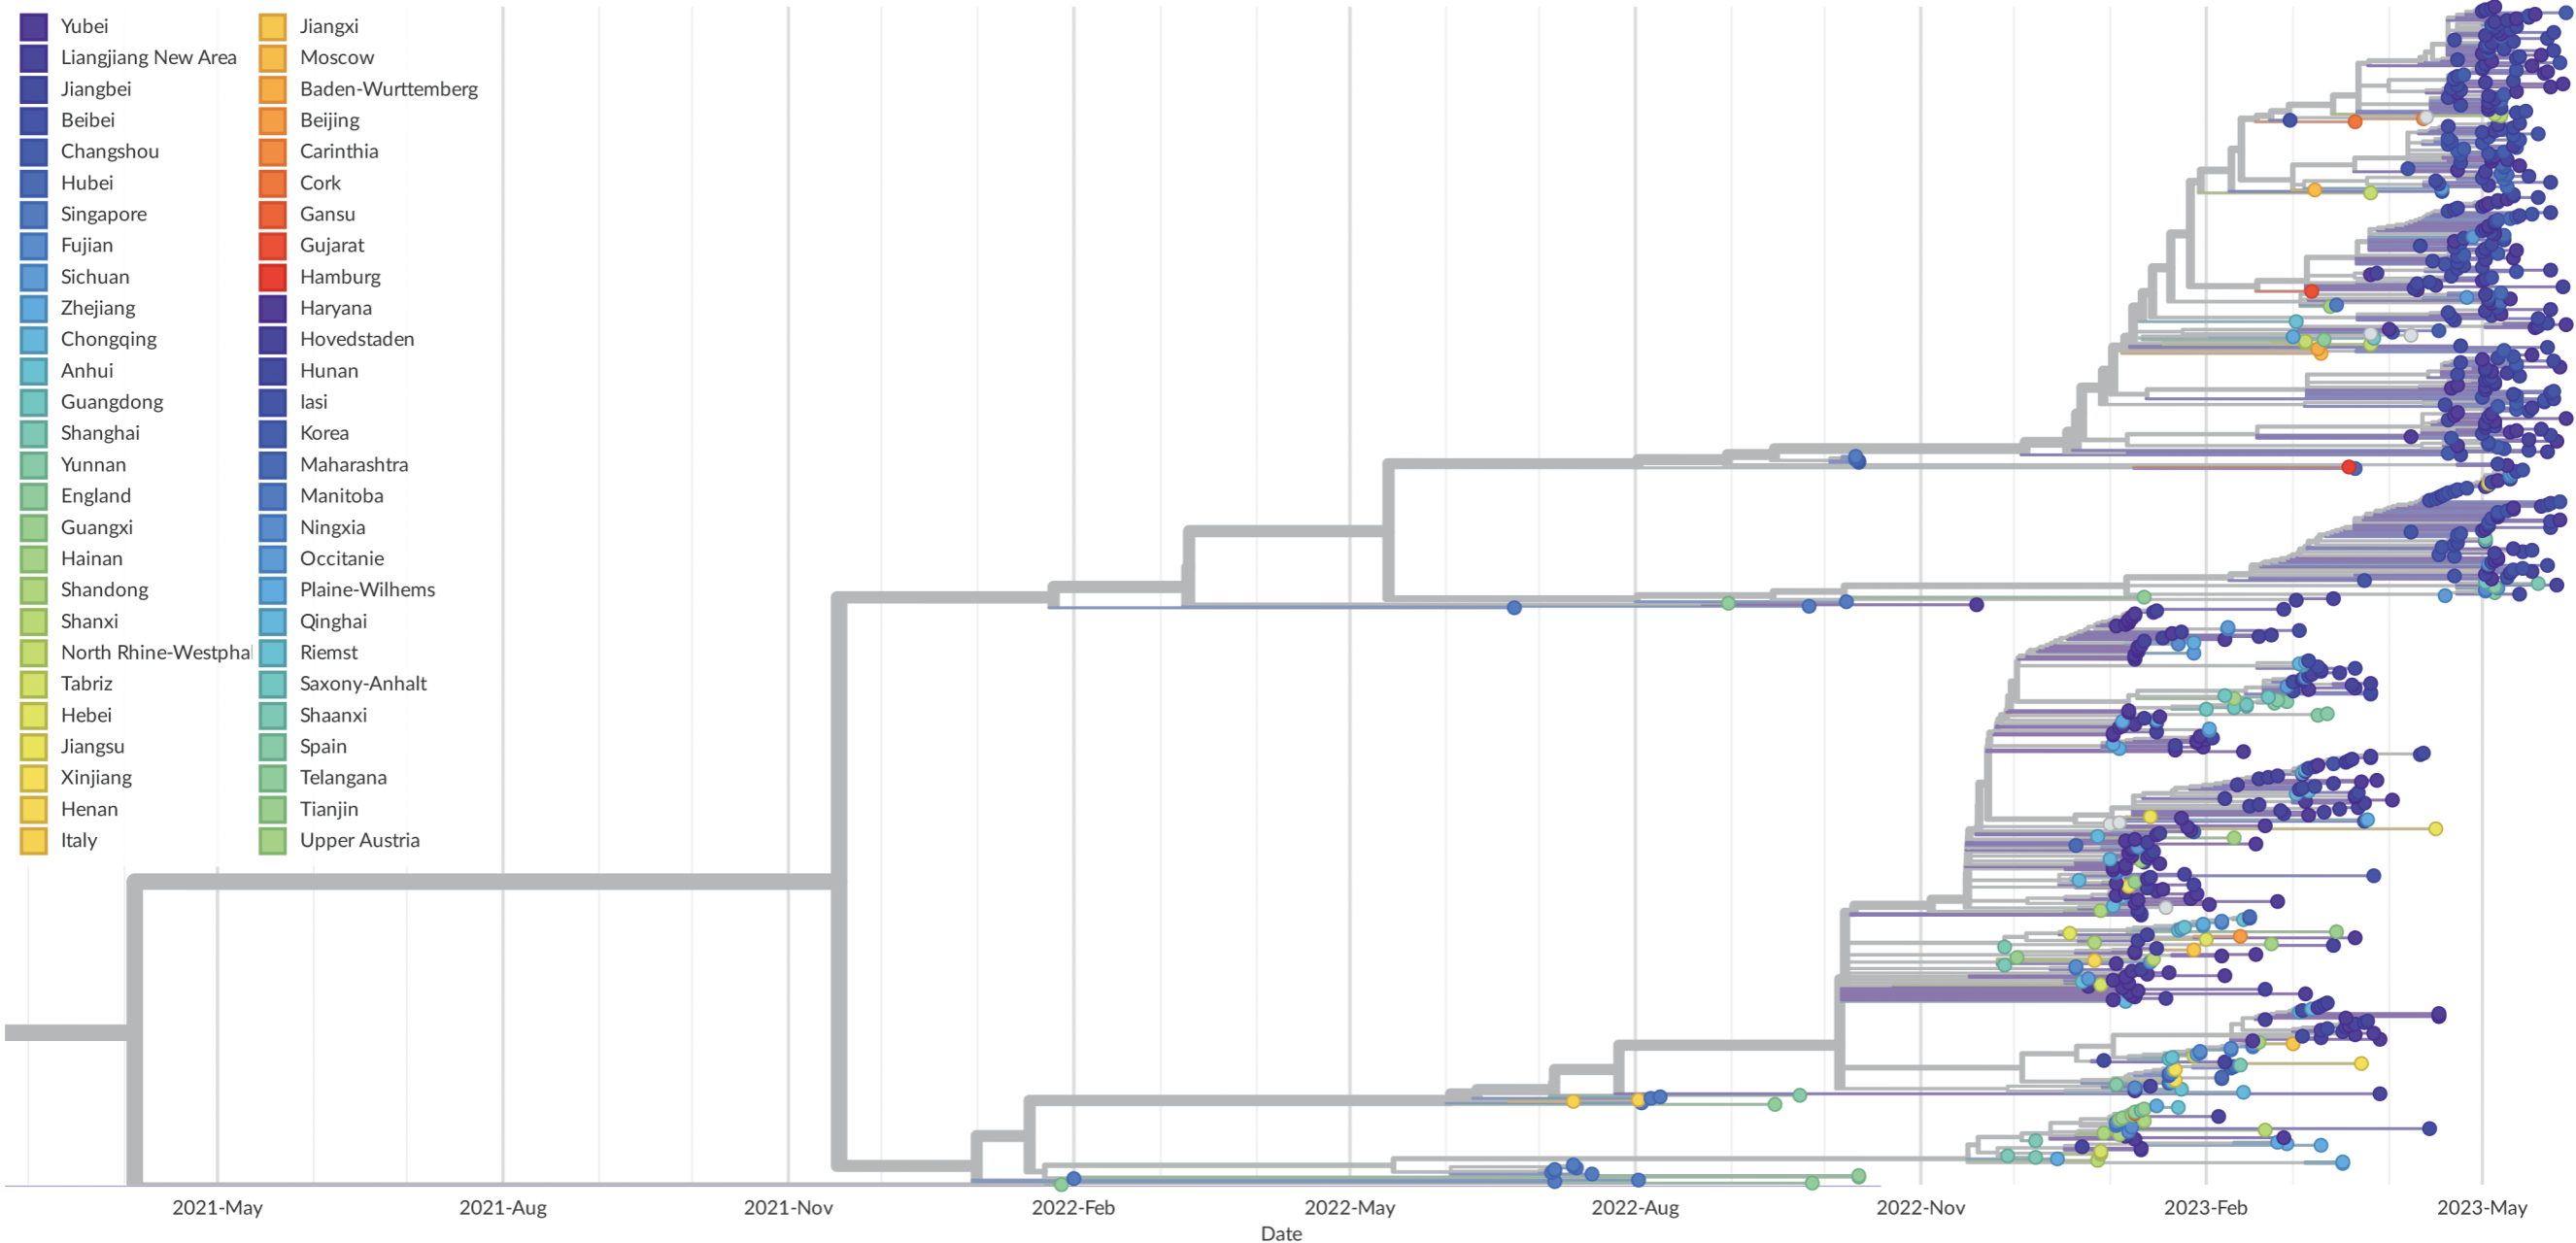

Supplement: MOESM2 [file 26606620]
